# Supplementary material for: Formation mechanism of porous rose-like WO3 and its photoresponse and stability study
Source: Royal Society of Chemistry journal article supplement (doi:10.1039/d0ce00185f), 2020-01-01
Supplement: d0ce00185f1.pdf [file d0ce00185f1.pdf]

## Supporting information

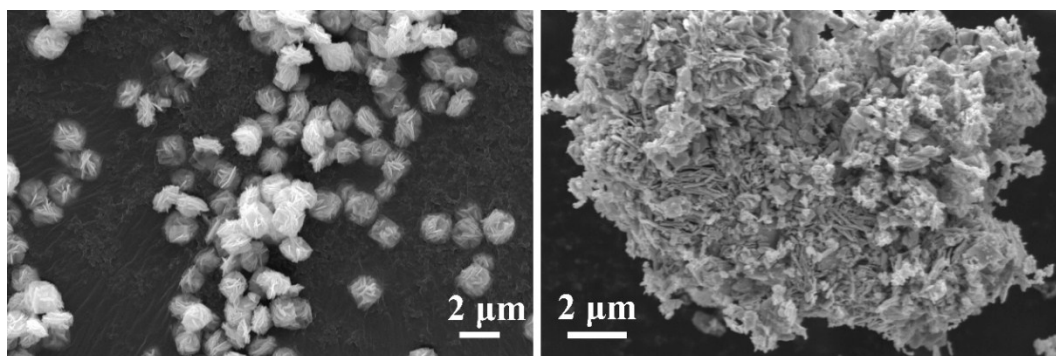

**Fig. S1** SEM images of  $\text{H}_2\text{WO}_4$  and  $\text{N-WO}_3$

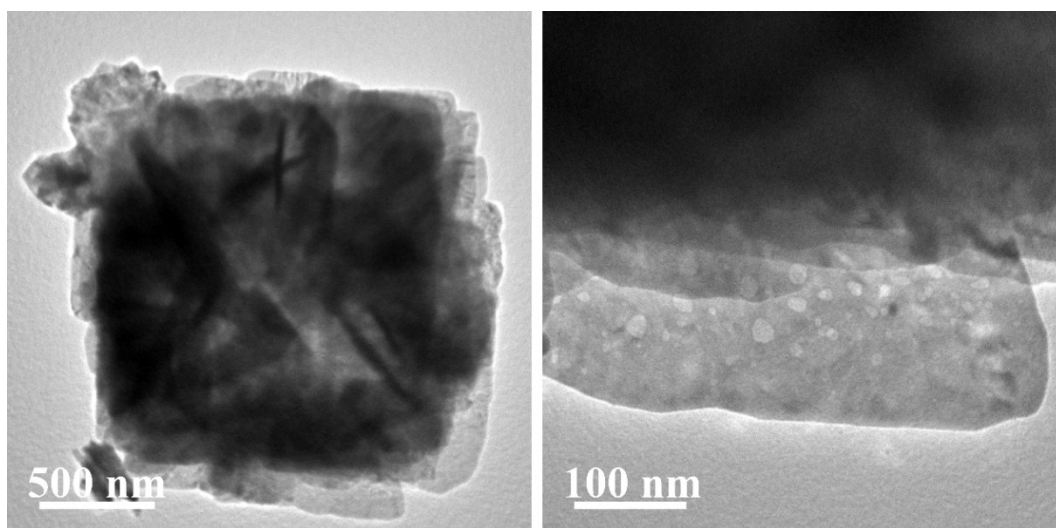

**Fig. S2** TEM images of  $\text{S-WO}_3$

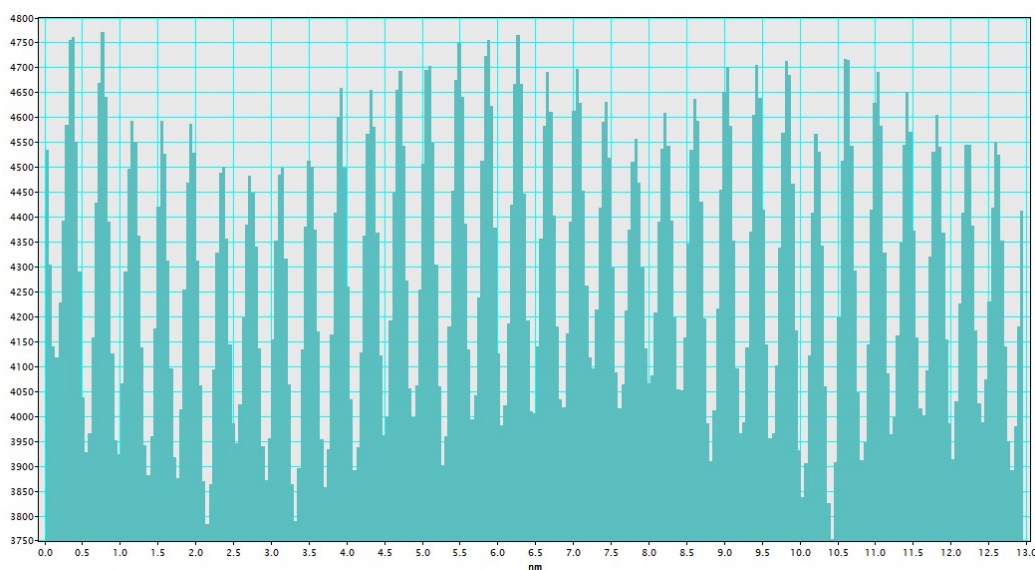

**Fig. S3** Profile of  $\text{L-WO}_3$

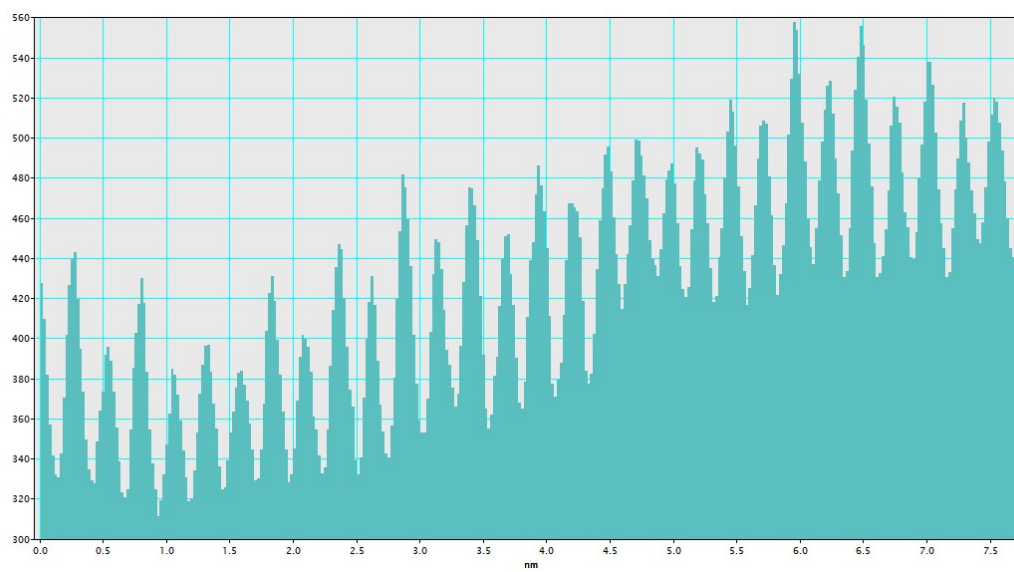

**Fig. S4** Profile of carbon on L-WO<sub>3</sub>

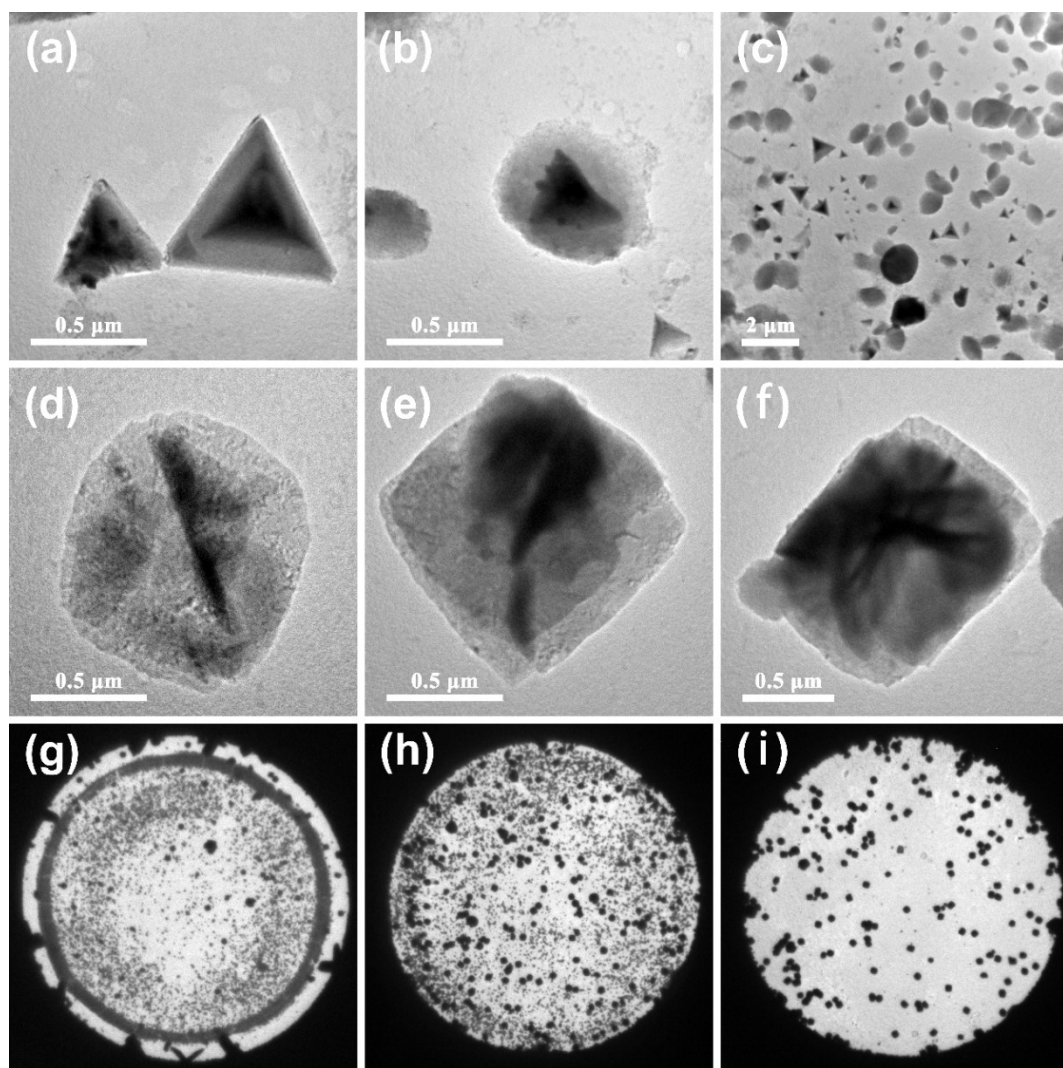

**Fig. S5** (a-c) TEM image of sample before reaction. (d) TEM image of sample after 30 min. (e, f) TEM images of sample after 60 min. (g-i) low magnifying images of samples after 30 min, 60 min and 90 min.

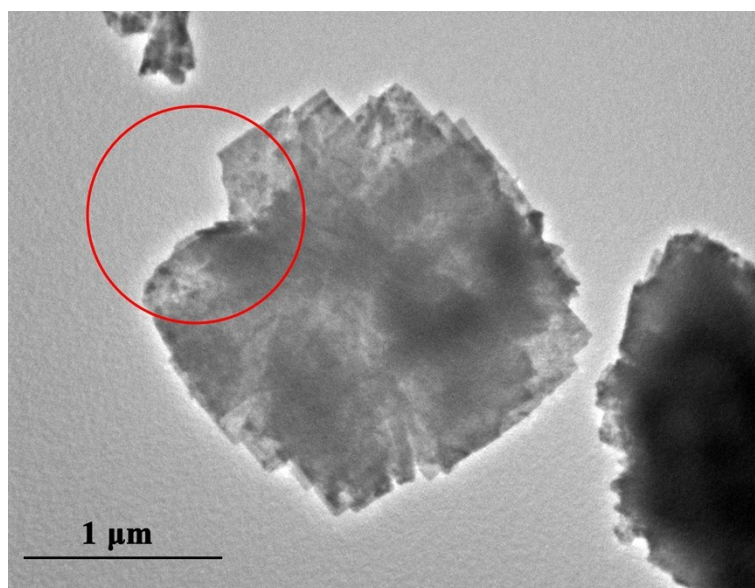

**Fig. S6** TEM image of broken rose-like WO<sub>3</sub>
